# Supplementary material
Source: publisher site journal article supplement (https://static.cambridge.org/content/id/urn:cambridge.org:id:article:S0016756820000321/resource/name/S0016756820000321supp001.xlsx)
Supplement: Supplementary file 1 [file S0016756820000321supp001.xlsx]

## Sheet: WR samples
S$	rock type*	Sri	Ndi	SiO[2]	TiO[2]	Al[2]O[3]	FeOt	MnO	MgO	CaO	Na[2]O	K[2]O	P[2]O[5]	Sr	La	Sm		References
ANC11022	monzogranite	0.705668	0.511875	71.75	0.32	14.57	2.81	0.06	0.77	1.96	3.34	3.79	0.25	105	35.7	6.33		Alasino et al. 2014
ANC11030a	tonalite-granodiorite	0.708651	0.511813	60.92	0.8	18.25	5.51	0.13	1.42	4.86	3.95	1.84	0.26	405	21.8	4.5		Alasino et al. 2016
ASP-221	gabbro-diorite			45.77	0.5	16.96	12.54	0.23	10.04	10.71	0.84	0.17	0.02	140	1.75	0.6		Dahlquist et al. 2012
CHA-3008	rhyolite	0.7059	0.51198	75.93	.13	12.49	2.23	.045	.55	.24	4.24	3.81	.02	44	33.1	7.44		Otamendi et al. 2009
FAM175	tonalite-granodiorite	0.70741	0.51182	66.5	0.623	15.35	5.26	0.211	1.02	3.81	4.69	1.41	0.16	235				Otamendi et al. 2012
FAM-176	gabbro-diorite	0.7053	0.5119	53.88	0.843	15.85	8.9	0.164	5.28	8.82	2.7	1.25	0.14	202	14.4	3.62		Rapela et al. 2018
FAM-213	tonalite-granodiorite	0.7073	0.51177	62.55	0.629	16.99	5.85	0.128	2.25	5.38	2.35	2.07	0.16	217	7.99	3.98
FAM303	monzogranite	0.70579	0.51185	76.64	0.09	13.05	1.12	0.04	0.1	1	3.94	4	0.02	44.21	27.95	4.32
FAM-332	hybrid	0.7121	0.51171	66.55	0.57	16.69	4.63	0.09	1.52	4.19	3.26	2.34	0.17	140	7.85	2.69
FAM-339	migmatite	0.7190	0.51167	65.8	0.78	17.89	6.47	0.12	2.65	0.83	2.15	3.12	0.19	105	49.18	9.32
FAM-349	migmatite	0.7133	0.511594	59.25	1.17	19.4	9.01	0.15	3.21	0.8	1.99	4.9	0.13	104	56.6	10.01
FAM-391	migmatite	0.7177	0.51169	71.77	0.761	11.92	4.2	0.077	1.66	1.57	2.67	2.34	0.2	147	38.9	7.29
FAM-392	gabbro-diorite	0.70815	0.51190	45.83	0.194	20.97	8.27	0.134	8.93	12.6	1.02	0.4	0.04	166	2.51	0.78
FAM40025	rhyolite	0.709450	0.511761	77.29	1.8	0.097	1.47		0.059	1.05	0.22	3.93	0.01	174	23.7	5.36
FAM-7081	rhyolite	0.7000	0.51188	74.73	.08	12.42	0.89	.008	.13	.14	1.25	9.11	.02	48	16	5.72
FAM-7083	monzogranite	0.7066	0.51188	75.58	0.16	12.31	1.84	0.06	0.19	1.04	3.48	3.9	0.03	72	46.7	7.65
FAM-7086	hybrid	0.7084	0.51172	62.73	0.64	17.16	5.83	0.15	2.22	3.23	3.61	2.76	0.05	122	73.9	14.2
GUA-252	monzogranite	0.70549	0.51175	77.88	.02	11.94	0.38	.09	.05	.42	2.58	5.92	.06	51
GUA-253	tonalite-granodiorite	0.70905	0.51176	63.63	.8	15.35	6.15	.15	2.84	4.84	2.7	2.14	.2	225
KS021	gabbro-diorite	0.70648	0.51187	48.35	0.85	17.41	10.84	0.19	7.45	11.41	0.95	0.25	0.12	300
KS042	gabbro-diorite	0.7082	0.51174	49.25	0.67	4.22	16.38	0.34	20.62	6.22	0.28	0.11	0.01	189
KS045	monzogranite	0.716727259199599	0.511678102088516	55.43	1.38	18.41	10.13		4.48	0.87	1.6	4.86	0.05	164
KS047	gabbro-diorite	0.71082	0.51175	49.02	1.29	18.28	12.39	0.24	4.98	9.27	2.16	0.69	0.28	215
KS054	migmatite		0.511671535487555	63.35	1.03	16.42	7.82		3.11	1.49	2.23	2.64	0.06	133
KS064B	migmatite	0.721638078674892	0.511656398003727	60.42	1.21	17.06	8.47		4.67	1.07	1.35	3.07	0.05	108
KS065	gabbro-diorite	0.70522	0.51206	48.99	0.87	15.24	9.59	0.18	8.59	12.96	1.65	0.19	0.07	106
KS072	gabbro-diorite	0.71865	0.511659274166555	59.56	0.79	16.53	7.2		3.25	5.87	2.46	1.98	0.17	170
KS075a	gabbro-diorite	0.71371	0.51180884618926	53.79	0.85	18.51	8.66		4.22	6.96	2.63	2.34	0.44	185
KS075b	gabbro-diorite	0.709335330008286	0.51172	49.25	0.99	14.86	12.83		7.12	10.65	1.44	0.59	0.05	187
KS084	tonalite-granodiorite	0.713908711828124	0.511730306111639	52.56	1.26	18.38	9.56		4.27	6.57	2.16	2.62	0.25	187
KS091	migmatite	0.716217657272677	0.511683398096141	73.8	0.72	11.69	4.32	0.06	1.61	0.93	1.83	3.01	0.13	132
KS093	tonalite-granodiorite	0.709697770408333	0.511724725894783	58.54	0.86	16.74	7.46		3.67	5.84	2.49	2.17	0.14	165
KS103a	leucogranite	0.71113404912395	0.511726530805153	73.83	0.12	12.62	1.06	0.02	0.29	1.34	1.64	6.46	0.04	151
KS103B	gabbro-diorite	0.706939767344662	0.51187	49.99	0.92	16.78	9.63		6.53	10.17	2.17	1.2	0.19	252
KS111	tonalite-granodiorite	0.712180266991992	0.511724685016232	65.62	0.69	15.31	5.45		1.72	4.3	2.94	1.95	0.19	150
KS116	leucogranite		0.511723956595314	76.54	0.03	12.09	0.4		0.08	1.18	1.84	5.8	0.02	125
KS117	tonalite-granodiorite	0.70906469620105	0.511770916948938	65.41	0.63	15.15	5.41		1.79	4.65	2.84	2.27	0.16	165
KS123	leucogranite		0.511770820651771	71.72	0.25	13.59	1.95		0.71	2.05	2.15	5.48	0.05	140
KS128A	tonalite-granodiorite	0.707421317637205	0.511762360390522	68.51	0.52	14.63	4.15		1.3	4.18	2.96	1.71	0.12	130
KS128B	gabbro-diorite	0.710586138936356	0.51180	48.81	1.56	17.29	12.4		4.32	9.16	2.97	1.49	0.26	204
MIR-1014	monzogranite	0.7059	0.51183	75.18	.24	13.19	6	6	6	1.74	3.68	3.46	.06	100	40.4	5.92
NAC-256	tonalite-granodiorite	0.7094		66.29	0.61	15.35	4.65	0.13	1.8	4.45	3.17	2.57	0.18	142	35.2	7.04
NAC-257	monzogranite	0.70877	0.511765	72.87	.27	13.47	2.00	.08	.69	2.38	2.82	4.44	.07	83
RLC-236	tonalite-granodiorite	0.7092	0.51176	66.93	0.57	14.8	4.89	0.09	2.29	4.83	2.89	1.98	0.12	150	28	4.48
RLC-241	monzogranite	0.70868	0.51172	75.02	.16	13.51	1.29	.08	.28	1.33	3.38	4.05	.05	78
RLC-243	tonalite-granodiorite	0.70852	0.51175	65.2	.58	14.98	5.02	.12	2.29	4.93	2.72	2.53	.12	128
SAN-225	monzogranite	0.70989	0.51172	70.27	.43	14	3.47	1.09	1.33	3.35	2.7	3.56	.11	136
SPP-22004	Amp-Mtgb-Gb	0.70655	0.51202	53.34	1.01	14.23	9.83	0.179	5.83	10.46	2	0.58	0.08	148	10	3.59
SPP-22005	Amp-Mtgb-Gb	0.70691	0.51198	53.28	0.754	15.42	8.65	0.163	6.91	11.12	2	0.54	0.07	134	7.39	2.72
SPP-22006	Amp-Mtgb-Gb	0.70701	0.51201	52.13	0.646	14.65	8.21	0.182	7.99	12.46	1.6	0.4	0.06	120	6.47	2.47
SPP-22012	Amp-Mtgb-Gb	0.70749	0.51204	52.02	0.785	14.51	8.63	0.158	7.47	11.13	1.61	0.51	0.07	141	7.64	2.74
SPP-22016	Amp-Mtgb-Gb	0.70955	0.512028	51.09	0.744	14.14	8.12	0.149	7.81	11.99	1.67	0.6	0.08	152	7.1	2.54
SVF-3017	gabbro-diorite	0.7072		46.73	.46	18.65	14.91	.17	9.26	12.42	1.02	.32	.07	231	4.36	1.88
SVF40039	gabbro-diorite	0.710056	0.511745	42.19	0.224	17.36	10.19	0.164	16.37	10.63	0.61	0.17	0.04	119	2.76	1.71
SVF-500	gabbro-diorite	0.70896	0.51193	40.32	0.06	16.53	10.02	0.15	19.92	8.86	0.33	0.03	0.02	99	0.9	0.18
SVF-501	gabbro-diorite	0.7093	0.51183	41.76	1.43	18.26	15.35	0.24	7.39	12.85	0.8	0.04	0.02	168	1.2	1.18
SVF-502	gabbro-diorite	0.7094	0.51179	45.52	0.48	17.5	11.58	0.21	12.73	9.9	0.74	0.47	0.04	144	3.2	1.31
SVF-508	tonalite-granodiorite	0.7102	0.51177	64.35	0.74	15.82	6.24	0.11	2.19	5.28	2.73	1.71	0.16	174	32.5	3.58
SVF-515	migmatite	0.7111	0.511716	72.35	0.7	12.72	6.33	0.13	2.64	1.63	1.67	1.17	0.04	104	60.5	8.75
SVF-521	tonalite-granodiorite	0.7090	0.51180	64.76	0.68	14.84	5.41	0.12	1.84	4.72	2.76	2.57	0.16	160	33.9	5.31
SVF532	tonalite-granodiorite	0.70890	0.51182	63.73	.59	14.89	5.34	.11	1.68	4.46	2.89	2.65	.23	157
SVF540	tonalite-granodiorite	0.70858	0.51182	67.17	.47	14.72	3.94	.12	1.24	3.78	3.3	3.14	.13	137
SVF564	leucogranite	0.7045	0.51177	72.15	.06	13.81	1.18	.12	.17	.85	3.45	4.96	.06	37
SVF-571	gabbro-diorite	0.7113	0.51175	49.1	1.17	20.42	8.96	0.18	4.77	8.03	3.06	0.4	0.04	256	30.6	1.95
SVF577	gabbro-diorite	0.709049	0.51173	42.58	1.28	19.05	13.68	.23	6.87	12.25	1.69	.52	.21	205	15.6	9.38
SVF-584	gabbro-diorite	0.7082	0.51185	48.5	0.22	18.32	7.68	0.16	10.9	11.96	0.68	0.11	0.02	157	1.9	0.67
SVF-591	gabbro-diorite	0.7066	0.51191	49.69	.64	16.75	8.65	.16	8.26	11.79	1.97	.76	.08	198	7.7	1.96
SVF603	monzogranite	0.7089	0.51180	76.07	.04	13.16	0.74	.11	.09	.8	3.9	4.8	.02	32
SVF-605	gabbro-diorite	0.7090	0.51179	42.66	0.04	24.84	5.12	0.09	10.45	13.55	0.64	0.08	0.08	171	0.6	0.12
SVF609	gabbro-diorite	0.7062	0.512185	51.79	0.83	15.54	9.14	0.18	7.66	11.13	1.21	0.54	0.09	103
SVF704	gabbro-diorite	0.7077	0.512027	52.09	1.18	13.55	11.51	0.19	5.26	8.75	2.71	0.64	0.12	149
SVF-709	migmatite	0.7112	0.51168	56.2	1.19	19.41	9.74	0.22	4.06	0.81	1.6	4.8	0.09	104
SVF715	gabbro-diorite	0.708	0.512126	49.05	1.23	14.9	11.22	0.19	6.29	10.07	2.85	0.25	0.12	241
SVF716	gabbro-diorite	0.7054	0.512276	51.36	1.45	13.35	13.14	0.22	6.28	10.51	1.87	0.25	0.13	124
TUA-1028	leucogranite	0.7071	0.51175	76.13	.13	13.18	1.12	.07	.33	.9	2.76	4.64	.06	61	22.9	4.49
TUA-1029	Crd monzogranite	0.7146	0.51167	73.64	.6	12.71	4.20	.1	1.41	.88	1.68	3.56	.14	100	41.1	6.87
VCA-1007	gabbro-diorite	0.7067	0.51184	46.5	1.1	18.07	12.73	0.23	5.86	10.66	1.82	0.89	0.19	235	15.8	6.19
VCA7000	Amphibolite	0.707224	0.51197	52.61	0.67	14.26	8.02	0.16	8.99	11.67	1.21	0.43	0.08	118.7	7.83	2.31
VCA7015	Amphibolite	0.706543	0.511985	50.31	0.43	15.51	8.26	0.13	10.14	12.77	1.63	0.49	0.05	94.18	3.69	1.28
VCA7033	Amphibolite	0.707406	0.511949	53.14	0.7	13.9	8.28	0.16	8.58	11.13	1.79	0.71	0.08	129	8.48	2.52
VCA7034	Amphibolite	0.712279	0.512023	51.13	0.77	15.8	8.74	0.16	7.4	11.31	1.83	0.62	0.08	176.6	8.15	2.6
VCA-7037	gabbro-diorite	0.7068	0.51173	46.88	0.566	17.08	10.18	0.116	9.06	12.22	1.27	0.3	0.05	140	4.13	1.62
VCA7038	tonalite-granodiorite	0.708585	0.51177	62.71	0.608	16.22	5.84	0.128	2.59	4.84	2.65	2.35	0.26	159
VCA7039	tonalite-granodiorite	0.708361	0.51177	62.67	0.707	15.88	6.2	0.128	2.49	5.5	2.82	1.9	0.19	194
VCA-7039	tonalite-granodiorite	0.7083	0.51178	62.67	0.707	15.88	6.2	0.128	2.49	5.5	2.82	1.9	0.19	159	28.8	3.67
VCA7040	tonalite-granodiorite	0.709639	0.51175	60.52	0.927	16.1	7.09	0.138	2.88	4.43	2.15	2.73	0.25	179
VCA7080	Amphibolite	0.706305	0.512048	51.71	0.64	15.35	7.5	0.14	8.26	12.33	1.34	0.25	0.07	96	6.45	2.03
VEL1026	Crd monzogranite	0.71148		68.2	.54	14.66	4.14	.07	1.42	2.09	2.32	4.32	.24	84
VEL3000	Crd monzogranite	0.71249		68.19	.71	15.36	4.4	.1	2.1	2.31	2.23	3.01	.17	110
VFBR10	tonalite-granodiorite	0.710498361789165	0.51118586556577	61.51	0.83	16.09	6.81		2.65	5.93	2.65	1.44	0.21	204
VFBR11	monzogranite	0.71829529521365	0.511581720688681	69.67	0.38	15.01	2.9		1.15	2.82	2.97	3.95	0.07	161
VFBR30	tonalite-granodiorite	0.709395189116527	0.511779577259463	61.85	0.81	16.18	6.56		2.88	5.79	2.81	1.99	0.13	210
VFMJ40A	tonalite-granodiorite	0.711068638453198	0.511700994978622	66.94	0.63	15.68	5.32		2	3.86	2.99	2.32	0.15	159
VFMJ40B	leucogranite	0.7111552049912	0.511746851148906	73.81	0.12	14.2	0.74	0.02	0.3	1.22	1.8	8	0.22	169
VFMJ41	tonalite-granodiorite	0.709793202479237	0.511770440422562	68.44	0.57	14.99	4.57		1.49	4.27	3.16	1.75	0.15	151
VFMJ43A	tonalite-granodiorite	0.707694751426009	0.51185	49.35	1.19	17.05	11.07		6.21	10.23	2.25	1.46	0.39	312
VFMJ48A	tonalite-granodiorite	0.709357682621884	0.511745690653566	66.2	0.61	16	5.04		1.6	5.03	3.14	1.96	0.16	202
VFMJ49	gabbro-diorite	0.70733	0.51183	49.12	0.42	16.61	6.96		9.45	11.83	2.12	0.86	0.06	277
VFSJ11	gabbro-diorite	0.710375908766232	0.511722973384166	51.9	0.52	16	8.81	0.15	8.07	10.92	0.93	0.73	0.01	113
VFSJ16	gabbro-diorite	0.705234712707389	0.512136405889821	51.36	0.97	13.33	10.8	0.2	8.34	11.16	1.84	0.59	0.08	105
VFSJ22	migmatite	0.715552495891605	0.511674865011309	69.15	0.79	13.76	6.81		2.62	1.21	1.93	3.55	0.04	128
VFSJ25b	gabbro-diorite	0.706311857720988	0.511972875053776	50.89	0.71	15.23	8.7	0.17	8.31	12.05	1.45	0.65	0.07	109
VFSJ28	tonalite-granodiorite	0.711933558944251	0.511735935555345	56.02	0.94	19.45	7.55		3.05	5.5	3.04	2.45	0.1	209
VFSJ29	tonalite-granodiorite	0.711756006674228	0.511736368060999	59.78	1	17.21	7.14		3.11	6.14	2.52	1.88	0.1	187
VFSJ33	tonalite-granodiorite	0.71067	0.511749642249306	54.64	0.93	18.09	8.6		4.38	7.9	2.44	1.44	0.18	188
VFSJ50	leucogranite	0.710075981961721	0.511742912020106	76.12	0.09	12.81	0.61	0.01	0.08	1.1	2.76	5.47	0.01	108
VFSK5	gabbro-diorite	0.712264138850866	0.511717008471368	52.44	1.25	18.88	9.56		4.23	7.26	2.45	2.35	0.29	210
VFSZ4a	tonalite-granodiorite	0.71090	0.511746519801637	54.39	0.95	17.98	8.71		4.46	8.16	2.65	0.96	0.17	208
VSFSJ10	gabbro-diorite	0.70543	0.51202	46.73	0.75	16.2	11.27	0.21	8.44	12.05	1.06	0.51	0.05	140
*Some rocks may have an overimposed metamorphism

## Sheet: La-Yb
S$	La	Yb	LaCon	YbCon			(La-Yb)N
AMBI-28	55.4	3.78	0.329	0.22	168.389	17.1818	9.80042
CAS-59	70.7	4.57	0.329	0.22	214.894	20.7727	10.345
CHEL-5	37.5	3.03	0.329	0.22	113.982	13.7727	8.2759
FAM115	32.59	2.59	0.329	0.22	99.0578	11.7727	8.41417
FAM120	26.45	2.07	0.329	0.22	80.3951	9.40909	8.54441
FAM175	25.1	7.57	0.329	0.22	76.2918	34.4091	2.2172
FAM213	7.99	2.78	0.329	0.22	24.2857	12.6364	1.92189
FAM7038	4.13	1.06	0.329	0.22	12.5532	4.81818	2.60538
FAM7039	28.8	1.22	0.329	0.22	87.538	5.54545	15.7855
FAM7040	26	2.27	0.329	0.22	79.0274	10.3182	7.65904
GUA-253	24.3	3	0.329	0.22	73.8602	13.6364	5.41641
GUA-254	21.3	1.7	0.329	0.22	64.7416	7.72727	8.37833
ILI-222	29.4	3.2	0.329	0.22	89.3617	14.5455	6.14362
KS072	21.79	3.54	0.329	0.22	66.231	16.0909	4.11605
KS093	42.14	3.23	0.329	0.22	128.085	14.6818	8.72406
KS111	30.38	1.46	0.329	0.22	92.3404	6.63636	13.9143
KS117	33.9	3.08	0.329	0.22	103.04	14	7.35997
KS128A	26.8	1.98	0.329	0.22	81.459	9	9.051
MIL-3	58.5	2.61	0.329	0.22	177.812	11.8636	14.9879
MIS-259	31.5	3.11	0.329	0.22	95.7447	14.1364	6.77294
NAC-255	35.1	1.53	0.329	0.22	106.687	6.95455	15.3406
NAC-256	35.2	3.91	0.329	0.22	106.991	17.7727	6.01995
PUL-244	41.4	3.63	0.329	0.22	125.836	16.5	7.62642
RCL-238	22.5	2.83	0.329	0.22	68.3891	12.8636	5.31646
RLC-234	21.2	2.6	0.329	0.22	64.4377	11.8182	5.45242
RLC-236	28	2.79	0.329	0.22	85.1064	12.6818	6.7109
RLC-237	18.9	3.39	0.329	0.22	57.4468	15.4091	3.72811
RLC-242	16.1	3.37	0.329	0.22	48.9362	15.3182	3.19465
RLC-243	29.4	2.9	0.329	0.22	89.3617	13.1818	6.77916
SVF521	33.9	2.6	0.329	0.22	103.04	11.8182	8.71873
SVF532	33.8	2.6	0.329	0.22	102.736	11.8182	8.69301
SVF540	28.9	3.8	0.329	0.22	87.8419	17.2727	5.08559
TUA-41	38.5	3.37	0.329	0.22	117.021	15.3182	7.63937
TUA-42	56	4.18	0.329	0.22	170.213	19	8.95857
VFBR10	17.68	1.24	0.329	0.22	53.7386	5.63636	9.53427
VFBR30	18.79	2.31	0.329	0.22	57.1125	10.5	5.43928
VFMJ40A	20.65	0.96	0.329	0.22	62.766	4.36364	14.3839
VFMJ43C	23.4	1.62	0.329	0.22	71.1246	7.36364	9.6589
VFMJ48A	33.1	2.61	0.329	0.22	100.608	11.8636	8.48036
VFML41	38.7	2.11	0.329	0.22	117.629	9.59091	12.2647
							7.98647
